# Supplementary material for: Phosphorylation state–dependent modulation of spinal glycine receptors alleviates inflammatory pain
Source: JCI journal article supplement (doi:10.1172/jci83817), 2016-06-05
Supplement: sd1 [file 1]

## Supplementary Figures and Tables

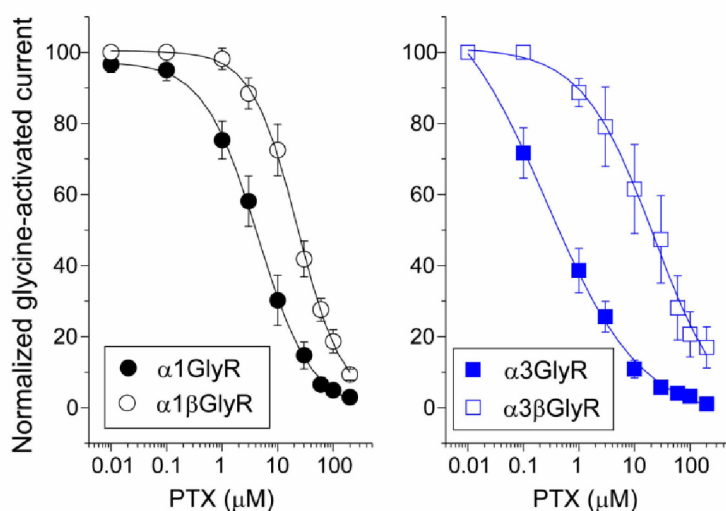

| GlyR | IC <sub>50</sub> (μM) | n <sub>H</sub> |
|------|-----------------------|----------------|
| α1   | 4.4±0.2               | 0.8±0.06       |
| α1β  | 22.7±1.7*             | 1.06±0.06      |
| α3   | 0.26±0.06             | 0.51±0.04      |
| α3β  | 22.2±8.0*             | 0.68±0.12      |

**Figure S1. Picrotoxin sensitivity of recombinant GlyRs.** Concentration-response curves of picrotoxin (PTX, 0.01 - 100 μM) were obtained using the EC<sub>50</sub> of glycine for each GlyR subtype (α1: 45 μM, α3: 200 μM, α1β: 40 μM, α3β: 210 μM). The entire PTX concentration range was tested on each cell. Coexpression of the β subunit significantly reduced picrotoxin sensitivity of α1 and α3 GlyRs, confirming the presence of heteromeric channel complexes containing both α and β subunits. Data are mean ± SEM from 6 - 9 cells per group. \*, p < 0.05, unpaired t-test.

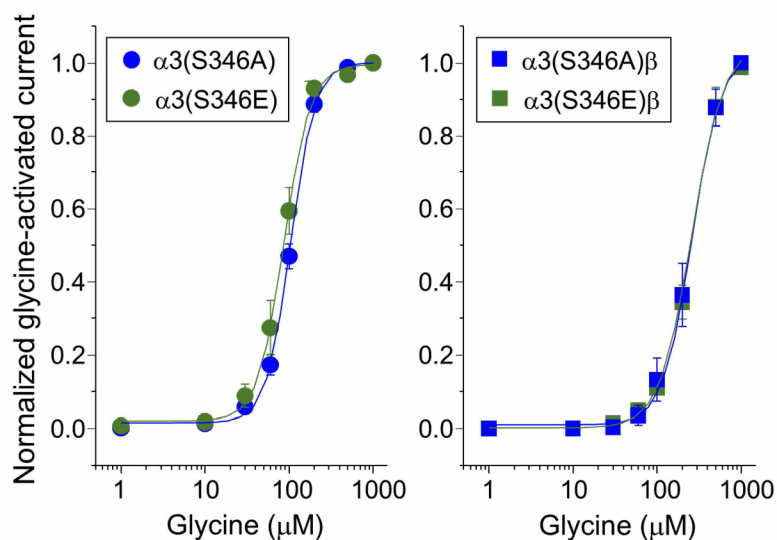

**Figure S2. Glycine sensitivity of homomeric and  $\alpha/\beta$  heteromeric  $\alpha3(S346A)$  and  $\alpha3(S346E)$  point mutated GlyRs expressed in HEK293T cells.**

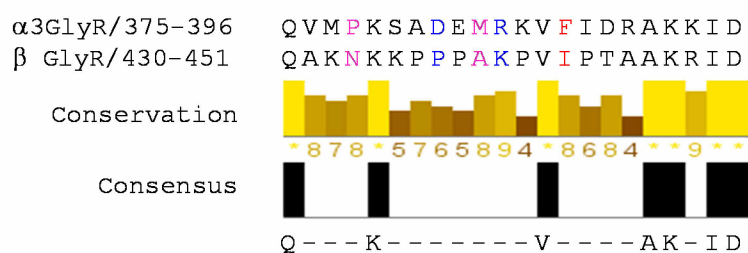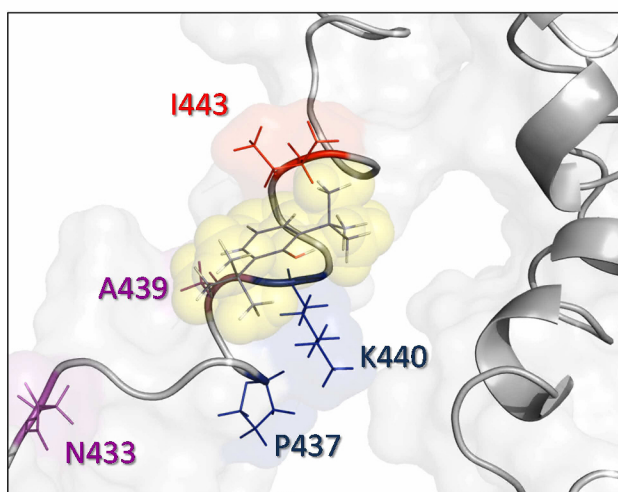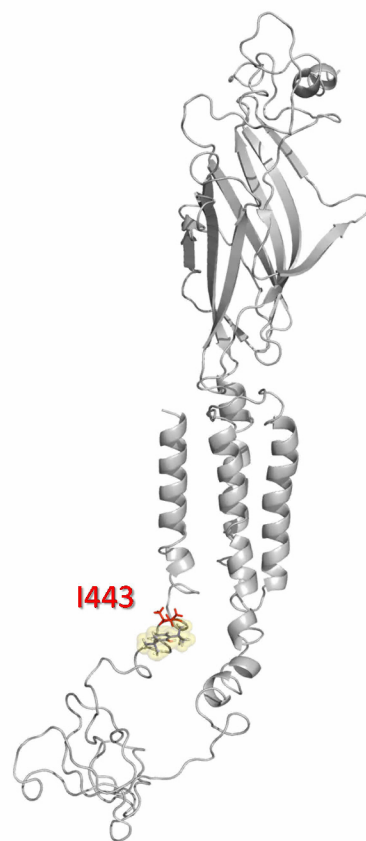

**Figure S3. Structural model of GlyR  $\beta$  subunit. (A)** Primary sequence alignment of the MA-stretch region of GlyR $\alpha3$  and GlyR $\beta$  subunits. The conservation scores are also shown (maximum 11, minimum 1). The identity percentage only reached 32%. **(B)** Homology model of  $\beta$  subunit monomer oriented in the plasma membrane. The location of the I443 residue (which is the counterpart of the F388 in  $\alpha3$ GlyR) is highlighted in red. **(C)** Detailed view of the

theoretical acceptor site of 2,6-DTBP in GlyR  $\beta$

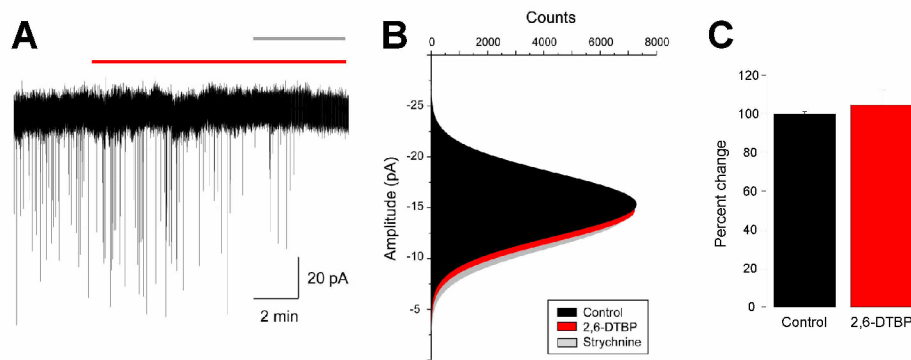

**Figure S4. Effects of 2,6-DTBP on tonic glycinergic membrane currents lamina II neurons.** Recordings were made in the presence of CNQX (5  $\mu$ M), D-APV (50  $\mu$ M) and bicuculline (10  $\mu$ M). **(A)** Example trace during control conditions, after application of 2,6-DTBP (100  $\mu$ M) and after additional application of strychnine (1  $\mu$ M). **(B)** The all-point histograms indicate the holding current amplitudes under these three conditions. **(C)** 2,6-DTBP did not significantly affect the holding current ( $+4.6 \pm 7.6\%$  of control amplitudes,  $p = 0.56$ , paired t-test).

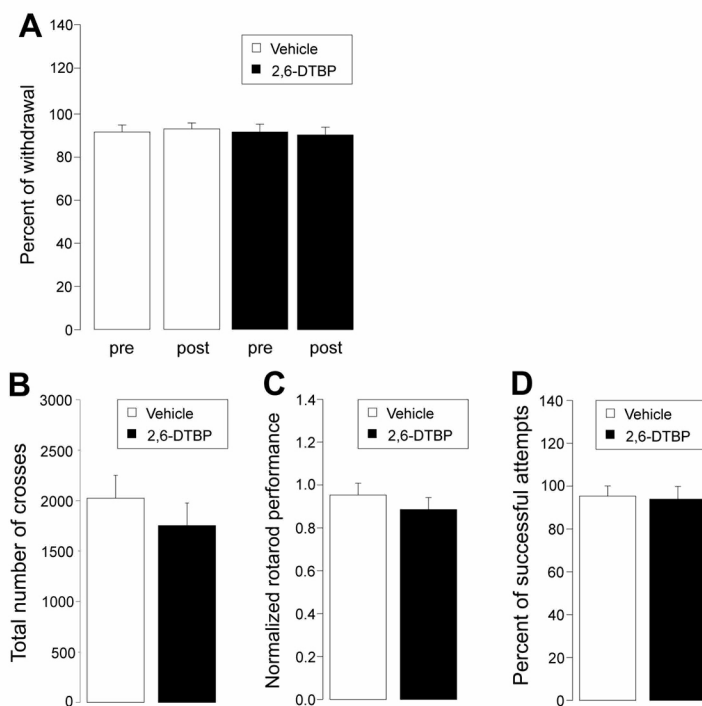

**Figure S5. Effects of 2,6-DTBP on locomotor activity, motor coordination, muscle relaxation and acute pain.** **(A)** 2,6-DTBP had no effect on acute nociceptive pain assessed in the pin-prick test in wild-type mice. **(B)** Locomotor activity (number of beam crosses in an open field arena, mean  $\pm$  SEM) of wild-type mice after the administration of vehicle or 2,6-DTBP.  $n = 8$  mice per group,  $p = 0.31$ , unpaired t-test. **(C)** Motor coordination (normalized time spent on an accelerating rotarod, mean  $\pm$  SEM) of wild-type mice after the administration of vehicle or 2,6-DTBP ( $n = 7 - 9$  mice per group,  $p = 0.39$ , unpaired t-test). **(D)** Muscle strength assessed in the horizontal wire test (percent number of successful attempts, mean  $\pm$  SEM).

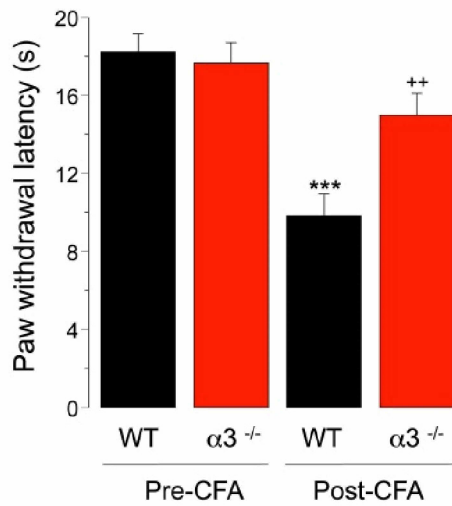

**Figure S6. Effects of 2,6-DTBP on heat hyperalgesia in wild-type and in GlyR $\alpha 3^{-/-}$  mice after injection of CFA.** Paw withdrawal latencies at baseline and 48 hrs after subcutaneous CFA injection. ANOVA followed by Bonferroni post-hoc test.  $F(3,61) = 10.38$ . \*\*\*,  $p < 0.001$  WT pre-CFA versus WT post-CFA, \*\*,  $p < 0.01$ , WT post-CFA versus GlyR $\alpha 3^{-/-}$  post-CFA.

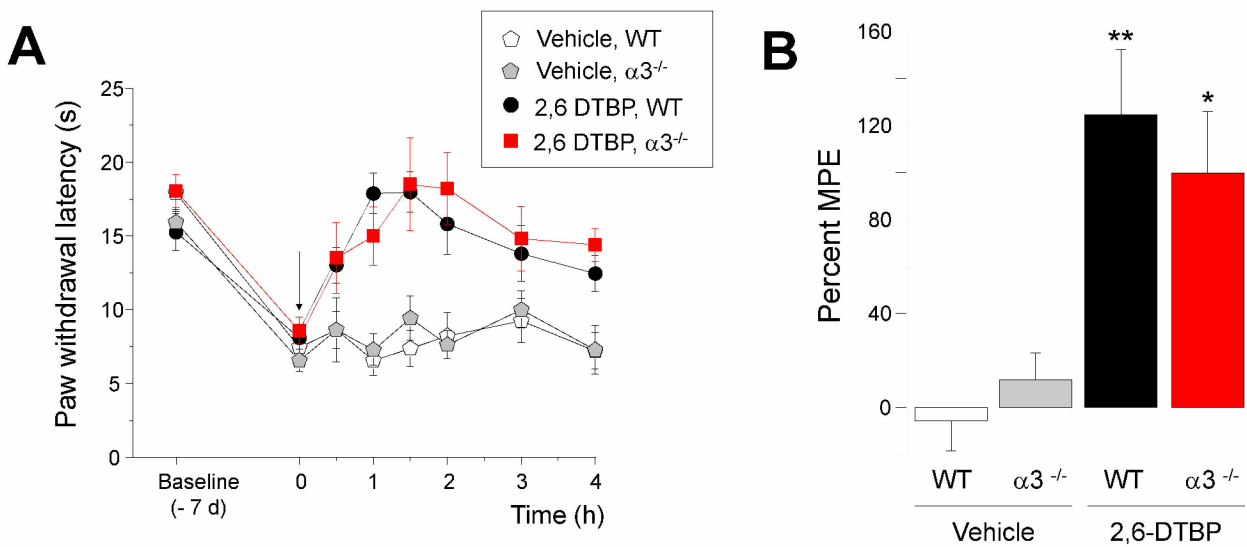

**Figure S7. 2,6-DTBP effects on heat hyperalgesia in neuropathic (CCI) wild-type and GlyR $\alpha 3^{-/-}$  mice. (A)** 2,6-DTBP or vehicle were applied (90 mg/kg, i.p.) on day 7 after CCI surgery. **(B)** ANOVA followed by Bonferroni post hoc test.  $F(3,25) = 9.42$ . \*\*,  $p < 0.01$ , \*,  $p < 0.05$  before versus after 2,6-DTBP.

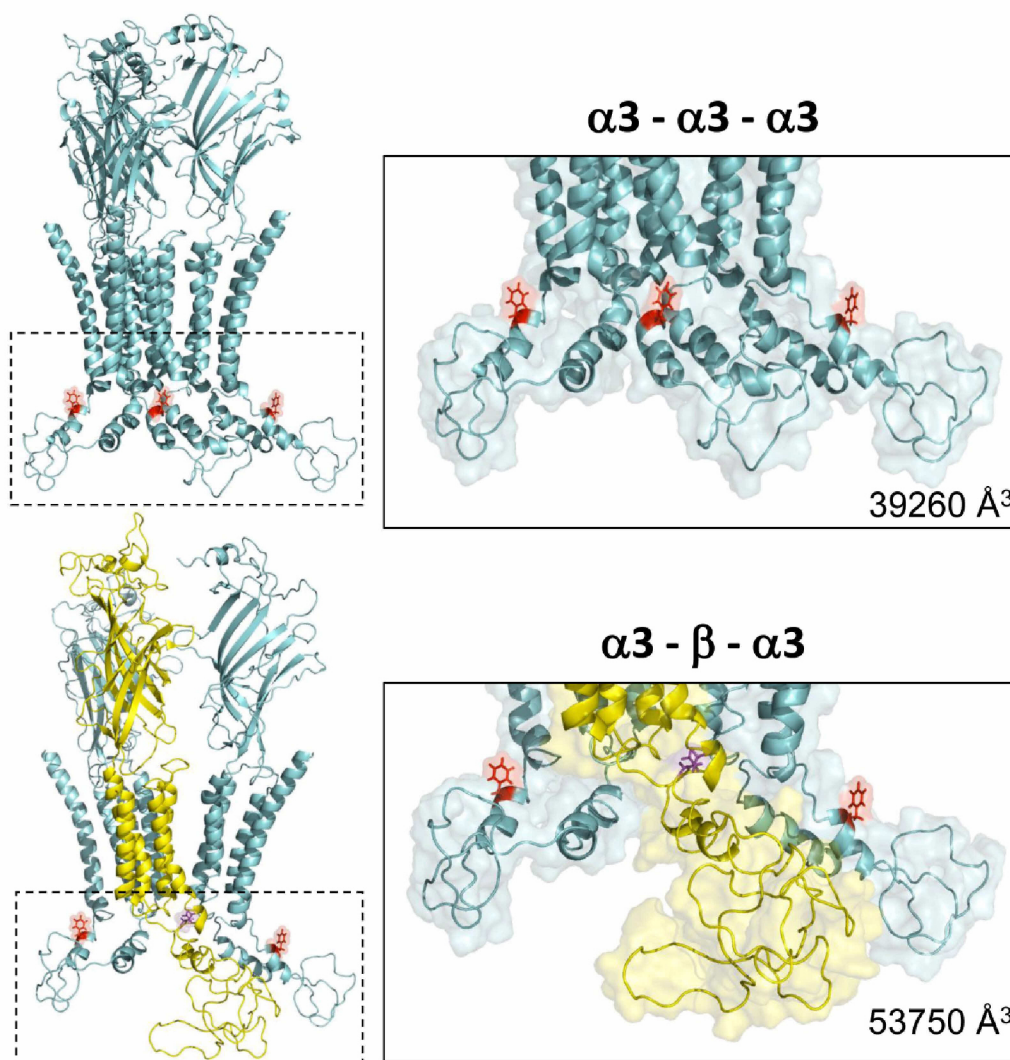

**Figure S8. Structural models of the  $\alpha3$ - $\alpha3$ - $\alpha3$  and  $\alpha3$ - $\beta$ - $\alpha3$  subunit interfaces.** Graphic representation of a homotrimeric assembly composed of identical  $\alpha3$  subunits (upper panels,  $\alpha3$  subunits in cyan) and of a heterotrimeric assembly composed by a single  $\beta$  subunit (in yellow) flanked by two  $\alpha3$  subunits (lower panels). Right panels, magnifications of the regions indicated on the left encircling the putative acceptor sites for 2,6-DTBP in the GlyR $\alpha3$  MA-stretch. The F388 residue in the GlyR $\alpha3$  subunit and the I443 residue in the GlyR  $\beta$  subunit are highlighted in red and purple, respectively. Calculated volumes of the magnified regions are 39260 Å<sup>3</sup> and 53750 Å<sup>3</sup>, for the  $\alpha3$ - $\alpha3$ - $\alpha3$  and the  $\alpha3$ - $\beta$ - $\alpha3$  assemblies, respectively.

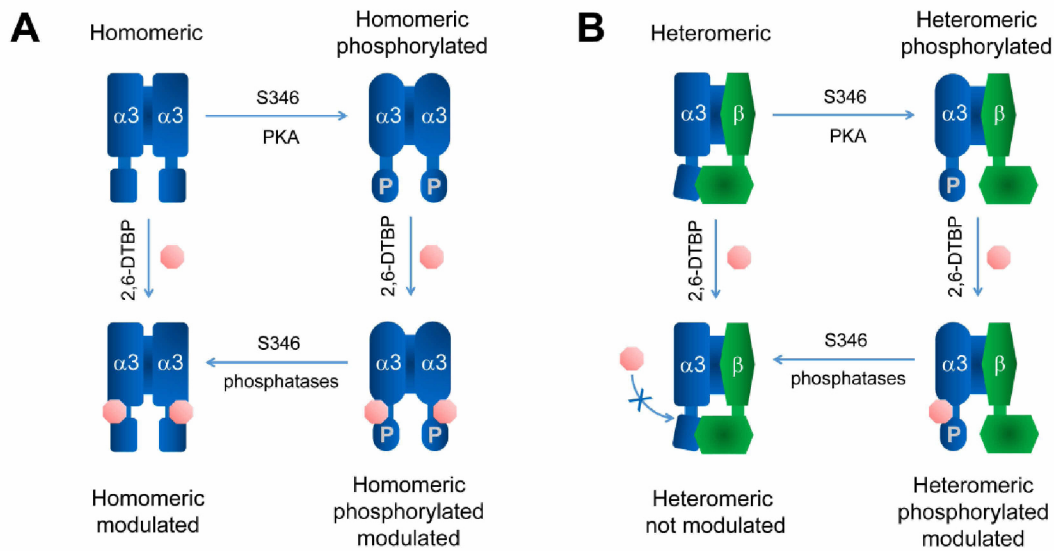

**Figure S9. Molecular requirements for allosteric modulation by 2,6-DTBP of  $\alpha 3$  and  $\alpha 3\beta$  GlyRs with phosphorylated or dephosphorylated GlyR $\alpha 3$  subunits. (A)** Dephosphorylated homomeric GlyR $\alpha 3$  are positively modulated by 2,6-DTBP. PKA-dependent phosphorylation of S346 changes the GlyR conformation without preventing the modulation by 2,6-DTBP. **(B)** Heteromeric  $\alpha 3\beta$  GlyRs display a low sensitivity to modulation by 2,6-DTBP in their dephosphorylated state possibly due to the occlusion of the 2,6-DTBP interacting site by the  $\beta$  subunit.

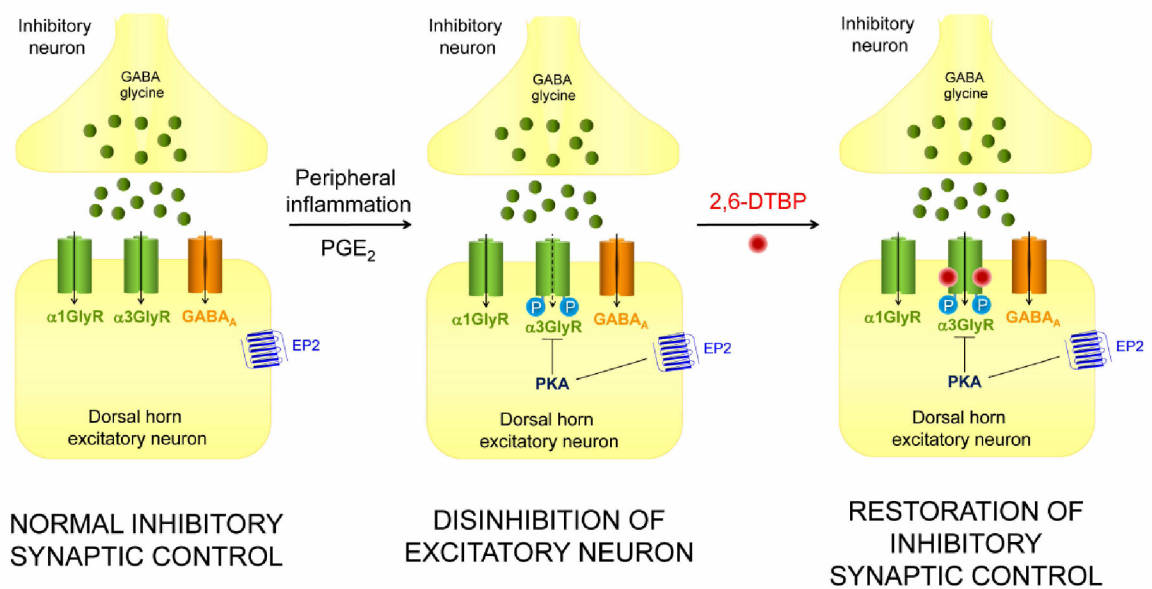

**Figure S10. Proposed mechanism of the antihyperalgesic action for 2,6-DTBP.** Presynaptic terminals of inhibitory interneurons release the neurotransmitters GABA and glycine into the synaptic cleft, allowing the phasic activation of postsynaptic GABA<sub>A</sub> and GlyRs. Under physiological conditions, the chloride influx through these ligand-gated ion channels provides efficient inhibitory control of excitatory neuron activity. Peripheral inflammation stimulates the production of spinal PGE<sub>2</sub>, which subsequently activates EP2 receptors and stimulates PKA-dependent phosphorylation of synaptic GlyRs containing  $\alpha 3$  subunits. Phosphorylation reduces the inhibitory postsynaptic currents through heteromeric  $\alpha 3\beta$ GlyRs and disinhibits dorsal horn neurons, which may contribute to the development and maintenance of hyperalgesic states. 2,6-DTBP selectively modulates synaptic  $\alpha 3\beta$ GlyRs in their phosphorylated states, allowing a restoration of the glycinergic control over the relay of nociceptive signals to higher CNS centers.

**Table S1. Concentration-response curves of recombinant GlyRs expressed in HEK293T cells.**

|                 | EC <sub>50</sub> (μM) | n <sub>h</sub> | I <sub>max</sub> (nA) | number of cells |
|-----------------|-----------------------|----------------|-----------------------|-----------------|
| α3              | 133±15                | 1.7±0.25       | 4.3±1.1               | 8               |
| α1              | 54±3.0                | 2.1±0.21       | 4.2±0.8               | 9               |
| α3β             | 117±5.0               | 3.0±0.32       | 4.0±1.0               | 9               |
| α1β             | 98±4.0                | 1.9±0.12       | 4.6±1.0               | 6               |
| α3 S346A        | 104±2.1               | 3.0±0.16       | 5.7±0.6               | 18              |
| α3 S346E        | 101±2.6               | 2.7±0.17       | 3.9±0.7               | 16              |
| α3β S346A       | 257±10.5              | 2.3±0.16       | 3.5±0.5               | 5               |
| α3β S346E       | 259±11.0              | 2.5±0.21       | 4.3±0.6               | 5               |
| α3 F388A        | 79±12.3               | 1.7±0.27       | 3.6±0.6               | 7               |
| α3 S346E-F388A  | 125±8.1               | 1.54±0.13      | 2.9±0.8               | 3               |
| α3β S346E-F388A | 81±6.2                | 1.7±0.25       | 4.3±1.2               | 4               |

Concentration-response parameters were obtained from fits of normalized current amplitudes to the equation  $I_{gly} = I_{max}(gly)^{n_h} / ((gly)^{n_h} + (EC_{50})^{n_h})$ . The mean maximal current (I<sub>max</sub>) indicates the average maximal current elicited by a saturating concentration of glycine (1 mM). Data were calculated from current responses activated by 1, 10, 30, 60, 100, 200, 500, and 1000 μM glycine recorded at a holding potential of -60 mV. All values are mean ± SEM.



**Table S2. Single-channel kinetic parameters of wild-type and mutant  $\alpha$ 3GlyRs in the absence or the presence of 2,6-DTBP.**

|       | GlyR $\alpha$ 3       |                     |                    |                    |                                             |                                  |                                 |                    |
|-------|-----------------------|---------------------|--------------------|--------------------|---------------------------------------------|----------------------------------|---------------------------------|--------------------|
|       | Glycine (100 $\mu$ M) |                     |                    |                    | Glycine (100 $\mu$ M)/2,6-DTBP (10 $\mu$ M) |                                  |                                 |                    |
|       | MOT (ms)              | MST (ms)            | nPo                | Main $\gamma$ (pS) | MOT (ms)                                    | MST (ms)                         | nPo                             | Main $\gamma$ (pS) |
| WT    | 21.6<br>$\pm$ 6.0     | 310.0<br>$\pm$ 60.5 | 0.20<br>$\pm$ 0.02 | 91.0<br>$\pm$ 1.20 | 55.6<br>$\pm$ 8.19 <sup>+</sup>             | 139.2<br>$\pm$ 21.5 <sup>+</sup> | 0.58<br>$\pm$ 0.10 <sup>+</sup> | 90.1<br>$\pm$ 0.92 |
| F388A | 19.1<br>$\pm$ 3.2     | 201.6<br>$\pm$ 51.9 | 0.18<br>$\pm$ 0.05 | 88.2<br>$\pm$ 1.82 | 18.1<br>$\pm$ 4.89                          | 213.6<br>$\pm$ 27.8              | 0.19<br>$\pm$ 0.04 <sup>*</sup> | 88.7<br>$\pm$ 1.46 |

<sup>\*</sup>, p < 0.05, t-test, wild-type versus (F388A) point mutated  $\alpha$ 3GlyR.

<sup>+</sup>, p < 0.05, paired t-test, control condition versus 2,6-DTBP

MOT, mean open time; MST, mean shut time; nPo, open probability;  $\gamma$ , conductance.

**Table S3. Binding energy and docking scores of different propofol analogs on  $\alpha$ 3GlyRs.**

|                                    | percentage potentiation on $\alpha$ 3GlyR | docking score | $\Delta$ G binding (kcal/mol) | dock* $\Delta$ G index |
|------------------------------------|-------------------------------------------|---------------|-------------------------------|------------------------|
| 2,4-di-tert-butylphenol            | 482 $\pm$ 96                              | -2.79         | -40.484                       | 112.950                |
| 2,6-di-isopropyl-phenol (propofol) | 442 $\pm$ 99                              | -2.505        | -38.708                       | 96.962                 |
| 2,6-di-tert-butylphenol            | 171 $\pm$ 21                              | -2.133        | -42.086                       | 89.784                 |
| 2,6-di-methoxy-phenol              | 3.0 $\pm$ 20                              | -2.476        | -32.177                       | 79.669                 |

Percent potentiation of wild-type  $\alpha$ 3GlyRs was calculated from experimental data using a modulator concentration of 100  $\mu$ M. 2,6-di-methoxy-phenol was inactive on  $\alpha$ 3GlyRs and showed the lowest Dock\* $\Delta$ G index. Dock\* $\Delta$ G reflects the relationship between the docking attributes of each modulator with their binding energy at the respective site. Percent potentiation and the Dock\* $\Delta$ G index show a linear correlation (r = 0.92, p = 0.08).
